# Supplementary material for: Local redox environment beneath biological membranes probed by palmitoylated-roGFP
Source: PubMed Central journal article supplement — Redox Biol. 2017 Nov 21;14:679–85. doi: 10.1016/j.redox.2017.11.015 (PMC5704182; doi:10.1016/j.redox.2017.11.015), 2017-11-21
Supplement: mmc1.pdf [file mmc1.pdf]

## Supplementary Data 1

### *Oligonucleotides used for subcloning*

| Oligo name        | sequence                                                                  |
|-------------------|---------------------------------------------------------------------------|
| XmaI_roGFP2Orp1_F | 5' -AA <b>CCCGGG</b> <u>ATCCACCGGTCGCCACCAT</u> GGCAGTGAGCAAGGGCGAGGAG-3' |
| NotI_roGFP2Orp1_R | 5' -AAG <b>CGGCCG</b> CCTAGCTAGAGTCGCGCCTTCCACCTCTTTCAAAG-3'              |
| XmaI_Grx1roGFP2_F | 5' -AA <b>CCCGGG</b> <u>ATCCACCGGTCGCCACCAT</u> GGCTCAAGAGTTTGTGAACTGC-3' |
| NotI_Grx1roGFP2_R | 5' -AAG <b>CGGCCG</b> CCTTACTTGTACAGCTCGTCCATGCCGAGAGTGATCCCGGC-3'        |

### **Oligonucleotides used in the study**

## Supplementary Data 2

### Material and methods: Cloning

Plasmids pEIGW/Grx1-roGFP2[1] and pEIGW/roGFP2-Orp1[2] were gifts from Dr. Tobias Dick (Addgene plasmid # 64990 and # 64993, respectively). pPalmitoyl-mTurquoise2[3] was a gift from Dr. Dorus Gadella (Addgene plasmid # 36209). Palmitoylated redox sensors were constructed from original plasmids pEIGW/Grx1-roGFP2 (Grx1-roGFP2<sup>Cyt</sup>), pEIGW/roGFP2-Orp1 (roGFP2-Orp1<sup>Cyt</sup>). Oligonucleotides used in the study are listed in Supplementary Data 1. To generate palmitoylated version of Grx1-roGFP2, entire region of Grx1-roGFP2 was amplified by PCR using DNA primers XmaI\_Grx1roGFP2\_F and NotI\_Grx1roGFP2\_R and pEIGW/Grx1-roGFP2 as a template. The resulting fragment was digested with XmaI and NotI. pPalmitoyl-mTurquoise2 plasmid was digested using the same set of restriction enzymes and subsequently treated with Antarctic phosphatase (New England BioLabs). Fragments were resolved on 1% agarose gel, isolated using QIAEX II Gel Extraction Kit (QIAGEN), and ligated using T4 DNA ligase (New England BioLabs). Ligated plasmids were introduced into XL10-Gold Ultracompetent cells (Agilent Technologies) by flash heat shock and transformed cells were selected on a culture plate containing 50 ug/ml kanamycine. The resulting plasmid pPalmitoyl-Grx1-roGFP2 (Grx1-roGFP2<sup>Pal</sup>) was propagated in the same bacterial host and extracted using Plasmid Midi Kit (QIAGEN). Plasmid DNA was further purified by Phenol/Chloroform/Isoamyl alcohol extraction and ethanol precipitation following standard laboratory procedures. Exactly the same strategy was adopted to construct pPalmitoyl-roGFP2-Orp1 (roGFP2-Orp1<sup>Pal</sup>) except that PCR was performed using primers XmaI\_roGFP2Orp1\_F and NotI\_roGFP2Orp1\_R and pEIGW/roGFP2-Orp1 as a template. The entire coding regions of Grx1-roGFP2<sup>Pal</sup> and roGFP2-Orp1<sup>Pal</sup> were sequenced for validation. DNA concentration was estimated by absorbance ( $\lambda=260$  nm) using NanoDrop ND-1000 UV-Vis spectrophotometer.

### References

- [1] M. Gutscher, A.-L. Pauleau, L. Marty, T. Brach, G.H. Wabnitz, Y. Samstag, A.J. Meyer, T.P. Dick, Real-time imaging of the intracellular glutathione redox potential., *Nat. Methods*. 5 (2008) 553–9.
- [2] M. Gutscher, M.C. Sobotta, G.H. Wabnitz, S. Ballikaya, A.J. Meyer, Y. Samstag, T.P. Dick, Proximity-based Protein Thiol Oxidation by H<sub>2</sub>O<sub>2</sub>-scavenging Peroxidases, *J. Biol. Chem.* 284 (2009) 31532–31540.
- [3] J. Goedhart, D. von Stetten, M. Noirclerc-Savoye, M. Lelimosin, L. Joosen, M.A. Hink, L. van Weeren, T.W.J. Gadella, A. Royant, A. Royant, Structure-guided evolution of cyan fluorescent proteins towards a quantum yield of 93%., *Nat. Commun.* 3 (2012) 751.

## Supplementary Data 3

### *Primary antibodies*

| antibody name                       | host animal       | Manufacturer      | catalogue number |
|-------------------------------------|-------------------|-------------------|------------------|
| <i>Primary antibodies</i>           |                   |                   |                  |
| Anti-EGFR                           | Mouse, monoclonal | Thermo Fisher     | MA5-13070        |
| Anti-TUFM                           | Mouse, monoclonal | ATLAS antibodies  | AMAb90964        |
| Anti-ABCD3                          | Mouse, monoclonal | ATLAS antibodies  | AMAb90995        |
| Anti-LAMP1                          | Mouse, monoclonal | ATLAS antibodies  | AMAB91170        |
| <i>Secondary antibodies</i>         |                   |                   |                  |
| Alexa Fluor 568 Anti-mouse IgG(H+L) | Goat, polyclonal  | Life Technologies | A11004           |

### **Antibodies used in the study**

## Supplementary Data 4

### Material and methods: Calculations for ratiometric analyses of the redox sensors

Degree of roGFP oxidation and redox potentials were calculated according to previously described procedures[1,2]. The percentage of sensor oxidation was calculated by the following Hanson's equation;

$$OxD = \frac{R - R_{red}}{I488_{min}/I488_{max} (R_{ox} - R) + (R - R_{red})}$$

where  $R$  stands for the ratio of I405 and I488 (I405/I488),  $R_{red}$  for the  $R$  value in completely reduced condition,  $R_{ox}$  for the  $R$  value in completely oxidized condition,  $I488_{max}$  and  $I488_{min}$  for I488 values in reduced and oxidized conditions. For glutathione sensor, redox potential of glutathione pair ( $E_{GSH/GSSG}$ ) was further calculated using the obtained  $OxD$  value. Redox potential of roGFP<sub>ox</sub>/roGFP<sub>red</sub> pair ( $E_{roGFP}$ ) was calculated using the following Nernst equation;

$$E_{roGFP} = E_{roGFP}^0 - \frac{RT}{zF} \frac{(1 - OxD)}{OxD}$$

where  $R$  stands for gas constant (8.315 J·K<sup>-1</sup>·mol<sup>-1</sup>),  $T$  for the absolute temperature (298 K),  $z$  for the number of electrons transferred in the redox reaction ( $z=2$ ),  $F$  for the Faraday constant (96485 C·mol<sup>-1</sup>), and  $E_{roGFP}^0$  for the standard redox potential of roGFP2 (-280 mV[3]). Assuming that the redox exchange between Grx1-roGFP2 and surrounding glutathione is equilibrated, redox potential of glutathione ( $E_{GSH/GSSG}$ ) equals  $E_{roGFP}$ .

### References

- [1] B. Morgan, M.C. Sobotta, T.P. Dick, Measuring E(GSH) and H2O2 with roGFP2-based redox probes., *Free Radic. Biol. Med.* 51 (2011) 1943–51.
- [2] M. Gutscher, A.-L. Pauleau, L. Marty, T. Brach, G.H. Wabnitz, Y. Samstag, A.J. Meyer, T.P. Dick, Real-time imaging of the intracellular glutathione redox potential., *Nat. Methods.* 5 (2008) 553–9.
- [3] C.T. Dooley, T.M. Dore, G.T. Hanson, W.C. Jackson, S.J. Remington, R.Y. Tsien, Imaging Dynamic Redox Changes in Mammalian Cells with Green Fluorescent Protein Indicators, *J. Biol. Chem.* 279 (2004) 22284–22293.

## Supplementary Data 5

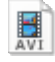

Supplementary  
Data 5.avi

### **Time-lapse movie showing constitutively oxidized glutathione pair near the cytosolic vesicles.**

Grx1-roGFP2Palm was transfected into HeLa cells and I405/I488 time-lapse imaging was performed by live-cell confocal microscopy. *R* value (I405/I488) represents the degree of sensor oxidation and shown in a false-color scale. Representative images are shown in the main figure 4A. Time is indicated in each image (h:m:s).
